# Supplementary material
Source: HighWire-hosted journal article supplement (https://jnm.snmjournals.org/highwire/filestream/95168/field_highwire_adjunct_files/0/192666_Supplemental_Data.pdf)
Supplement: 192666_Supplemental_Data.pdf [file 192666_Supplemental_Data.pdf]

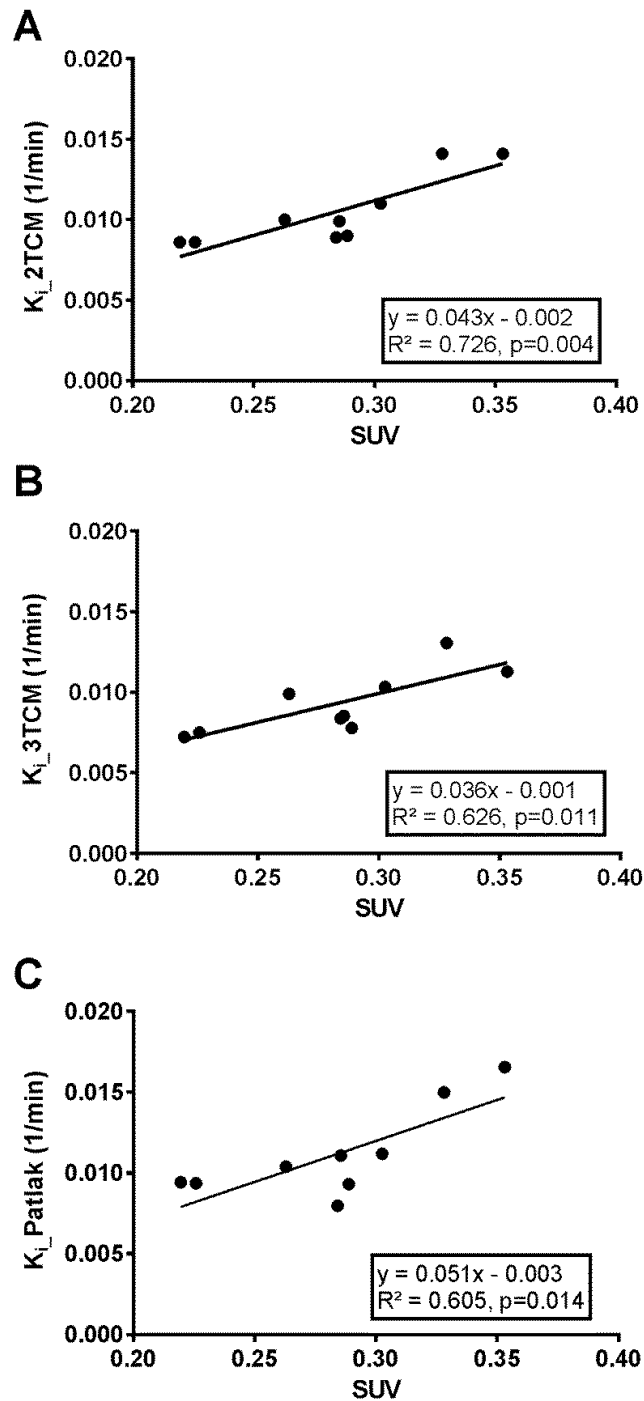

**Supplemental figure 1.** Correlation between SUV and  $K_i$  values from kinetic analysis using A) the 2TCM; B) the 3TCM or C) Patlak graphical analysis performed on the same tumors.

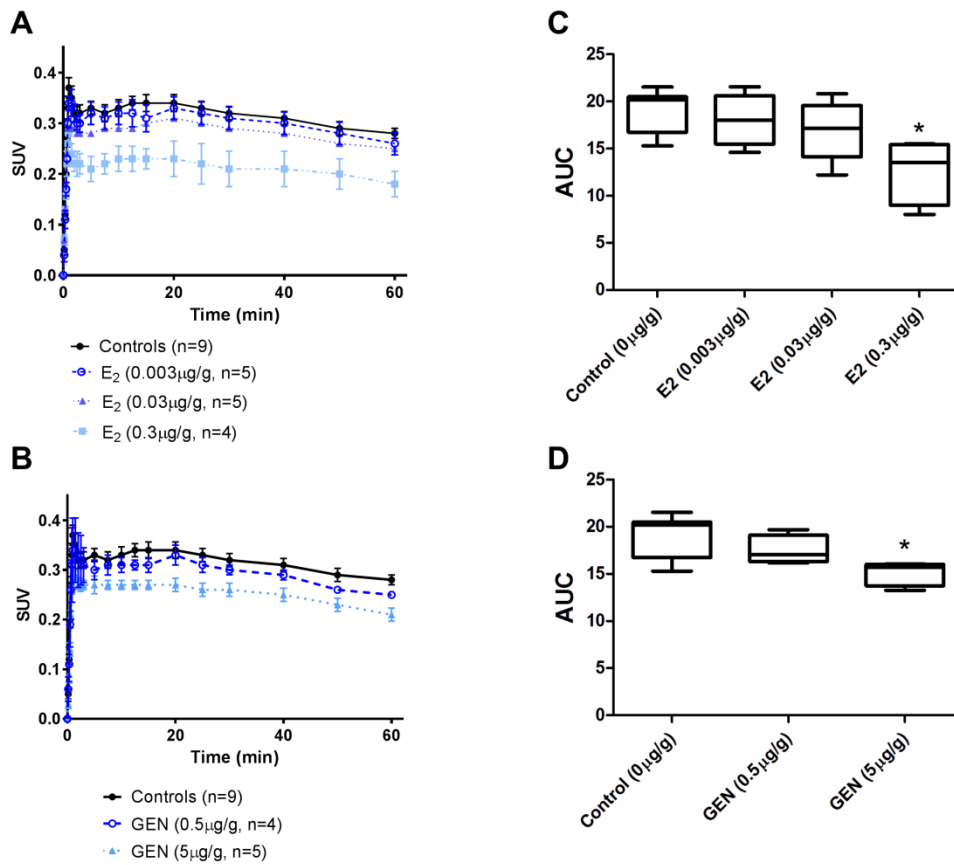

**Supplemental figure 2.** Kinetics of <sup>18</sup>F-FHNP in the SKOV3 xenografts. The effect of A) estradiol (E<sub>2</sub>) and B) genistein (GEN) doses on tracer kinetics in the tumor over time. The effect of: C) estradiol and D) genistein on the area under the curve (AUC, min) for the different experimental groups. \* p<0.05 when compared to the control group.
